# Supplementary material for: “Off–On” fluorescent sensing of organophosphate pesticides using a carbon dot–Au(iii) complex
Source: Royal Society of Chemistry journal article supplement (doi:10.1039/c7ra13404e), 2018-01-01
Supplement: c7ra13404e1.pdf [file c7ra13404e1.pdf]

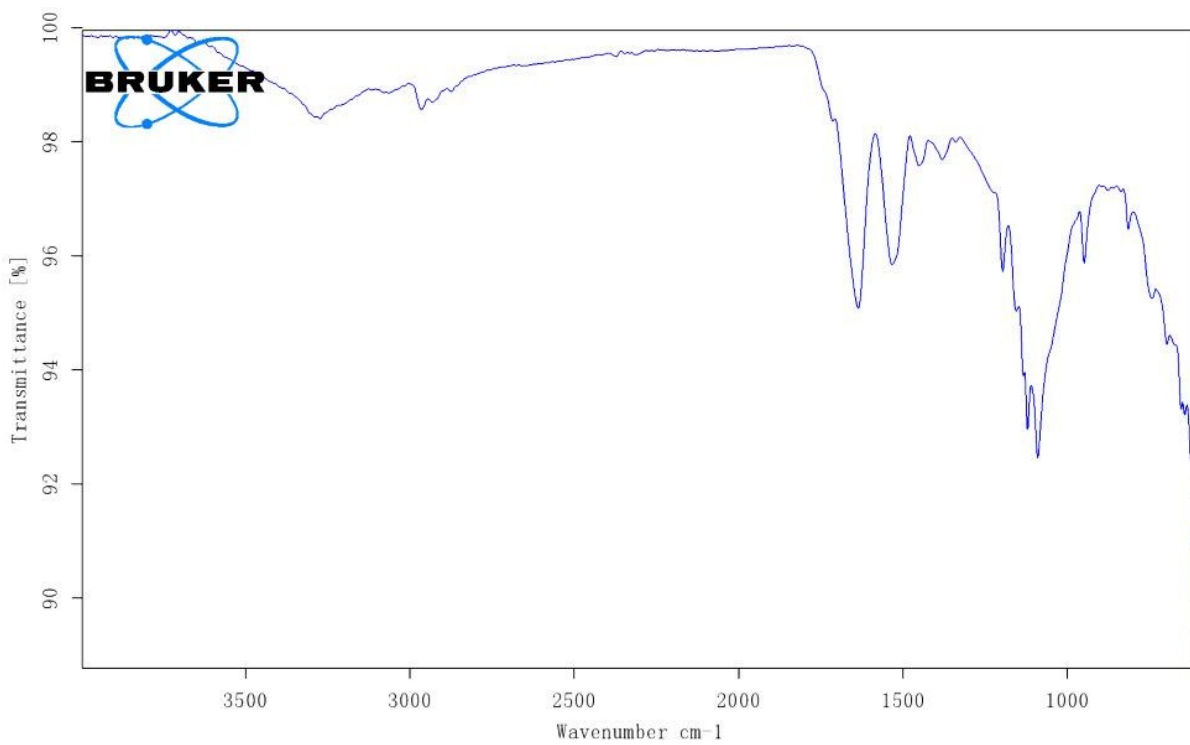

Figure S1

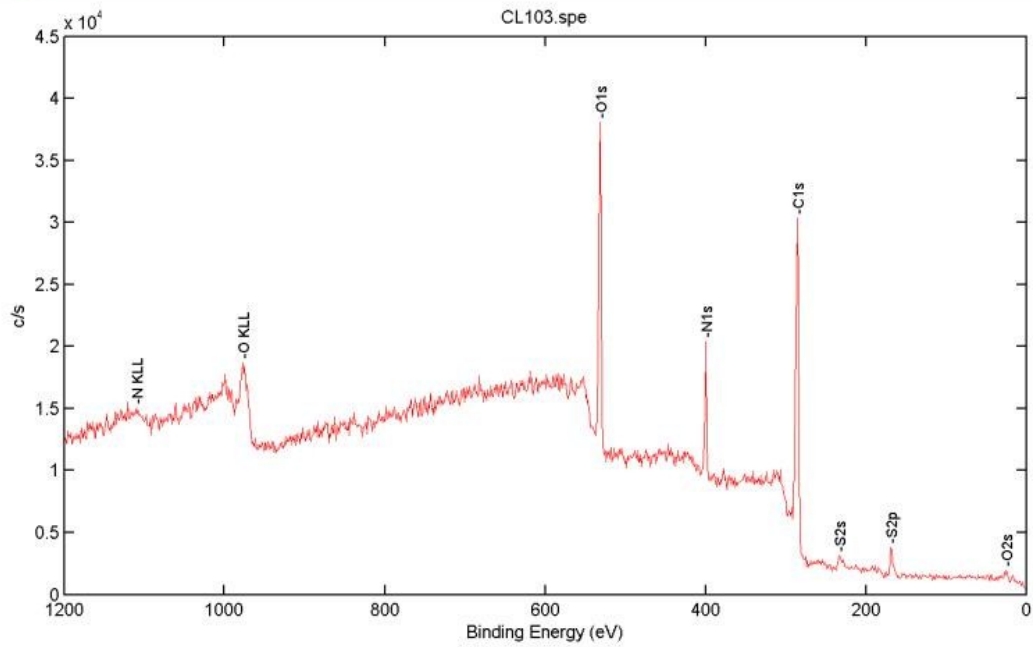

Figure S2
